# Supplementary material for: Prophages and satellite prophages are widespread in Streptococcus and may play a role in pneumococcal pathogenesis
Source: PubMed Central journal article supplement (PMC6813308; doi:10.1038/s41467-019-12825-y), 2019-10-24
Supplement: 41467_2019_12825_MOESM1_ESM.pdf [file 41467_2019_12825_MOESM1_ESM.pdf]

Supplementary information for:

**Prophages and satellite prophages are widespread in *Streptococcus* and may play a role in pneumococcal pathogenesis**

Rezaei Javan et al

| Supplementary Table 1. Distribution of clusters of orthologous group (COG) categories for all streptococcal genes (i.e. genome-wide) compared to those flanking the prophage. |                                                                   |                         |              |                          |              |            |
|-------------------------------------------------------------------------------------------------------------------------------------------------------------------------------|-------------------------------------------------------------------|-------------------------|--------------|--------------------------|--------------|------------|
| Type                                                                                                                                                                          | Functional categories                                             | Flanking prophage genes |              | Streptococcus spp genes* |              | Difference |
|                                                                                                                                                                               |                                                                   | Total (n)               | Percentage   | Total (n)                | Percentage   |            |
| Cellular processes and signalling                                                                                                                                             | [O] Posttranslational modification, protein turnover, chaperones  | 226                     | 3.5%         | 3,930                    | 3.2%         |            |
| Cellular processes and signalling                                                                                                                                             | [M] Cell wall/membrane/envelope biogenesis                        | 221                     | 3.4%         | 6,492                    | 5.2%         |            |
| Cellular processes and signalling                                                                                                                                             | [V] Defense mechanisms                                            | 216                     | 3.3%         | 4,119                    | 3.3%         |            |
| Cellular processes and signalling                                                                                                                                             | [U] Intracellular trafficking, secretion, and vesicular transport | 151                     | 2.3%         | 1,657                    | 1.3%         |            |
| Cellular processes and signalling                                                                                                                                             | [T] Signal transduction mechanisms                                | 112                     | 1.7%         | 3,187                    | 2.6%         |            |
| Cellular processes and signalling                                                                                                                                             | [D] Cell cycle control, cell division, chromosome partitioning    | 68                      | 1.0%         | 1,367                    | 1.1%         |            |
| <b>Subtotal:</b>                                                                                                                                                              |                                                                   | <b>994</b>              | <b>15.3%</b> | <b>20,752</b>            | <b>16.7%</b> | -1.4%      |
| Information storage and processing                                                                                                                                            | [L] Replication, recombination and repair                         | 818                     | 12.6%        | 10,255                   | 8.2%         |            |
| Information storage and processing                                                                                                                                            | [J] Translation, ribosomal structure and biogenesis               | 619                     | 9.5%         | 10,082                   | 8.1%         |            |
| Information storage and processing                                                                                                                                            | [K] Transcription                                                 | 579                     | 8.9%         | 9,066                    | 7.3%         |            |
| <b>Subtotal:</b>                                                                                                                                                              |                                                                   | <b>2,016</b>            | <b>31.0%</b> | <b>29,403</b>            | <b>23.6%</b> | 7.4%       |
| Metabolism                                                                                                                                                                    | [G] Carbohydrate transport and metabolism                         | 418                     | 6.4%         | 9,779                    | 7.9%         |            |
| Metabolism                                                                                                                                                                    | [P] Inorganic ion transport and metabolism                        | 403                     | 6.2%         | 5,868                    | 4.7%         |            |
| Metabolism                                                                                                                                                                    | [E] Amino acid transport and metabolism                           | 385                     | 5.9%         | 9,704                    | 7.8%         |            |
| Metabolism                                                                                                                                                                    | [F] Nucleotide transport and metabolism                           | 214                     | 3.3%         | 4,308                    | 3.5%         |            |
| Metabolism                                                                                                                                                                    | [I] Lipid transport and metabolism                                | 130                     | 2.0%         | 2,472                    | 2.0%         |            |
| Metabolism                                                                                                                                                                    | [C] Energy production and conversion                              | 115                     | 1.8%         | 4,295                    | 3.5%         |            |
| Metabolism                                                                                                                                                                    | [H] Coenzyme transport and metabolism                             | 97                      | 1.5%         | 2,804                    | 2.3%         |            |
| Metabolism                                                                                                                                                                    | [Q] Secondary metabolites biosynthesis, transport and catabolism  | 27                      | 0.4%         | 744                      | 0.6%         |            |
| <b>Subtotal:</b>                                                                                                                                                              |                                                                   | <b>1,789</b>            | <b>27.5%</b> | <b>39,974</b>            | <b>32.1%</b> | -4.6%      |
| Poorly characterised                                                                                                                                                          | [S] Function unknown                                              | 1,707                   | 26.2%        | 34,377                   | 27.6%        | -1.4%      |
| <b>Total**</b>                                                                                                                                                                |                                                                   | <b>6,506</b>            | <b>100%</b>  | <b>124,526</b>           | <b>100%</b>  |            |

\*Sum total of genes in each category, as represented by a dataset consisting of one reference genome for each of 70 different *Streptococcus* spp.

\*\*Chi square test of 2x4 contingency table (flanking prophage genes vs streptococcal genes among four COG groups): p value <0.00001

**Supplementary Table 2. Pneumococcal strain, plasmid and primers used in this study.**

| Name                   |                         | Description (source/reference/sequence)                                                                                                                                                                 |
|------------------------|-------------------------|---------------------------------------------------------------------------------------------------------------------------------------------------------------------------------------------------------|
| <b>Plasmid</b>         | pR412                   | Derived from ColE1, carrying a 1145 bp minitransposon that contains Himar1 IRs flanking <i>addA9</i> gene. Spc <sup>R</sup> (Martin, B., Prudhomme, M., Alloing, G., Granadel, C., Claverys, J.P. 2000) |
| <b>Strain</b>          | 6B(BHN418)*             | <i>S. pneumoniae</i> capsular serotype 6                                                                                                                                                                |
| <b>Primers</b>         | SpnSP_UpF               | GGTTTTCATGATGTTGTTCTGG                                                                                                                                                                                  |
|                        | SpnSP_Upspec_F          | GAGAGAAAACTTGTTCATGATCCCCGTTTGATTTTAAAT                                                                                                                                                                 |
|                        | SpnSP_UpspecR           | TTAAAAATCAAACGGGGGATCATGAAACAAGTTTTTCTCT                                                                                                                                                                |
|                        | SpnSP_Downspec_F        | ATTGGATCCATTCCGCGTCTTTAACCTTACCACGGAATTA                                                                                                                                                                |
|                        | SpnSP_Downspec_R        | TAATCCGTGGTAAGGTTAAAGACGCGGAATGGATCCAAT                                                                                                                                                                 |
|                        | SpnSP_DownR             | GATAGCTCCATGTCCGTTGATAC                                                                                                                                                                                 |
|                        | SpnSP_Up confirmation   | GAAAAGACCATGGTTGGGAT                                                                                                                                                                                    |
|                        | SpnSP_Down confirmation | G TTCAGGTA ACTCCAAAACC                                                                                                                                                                                  |
|                        | VapE_UpF                | G TTCCTGAAGGGGCAGATATTG                                                                                                                                                                                 |
|                        | VapE_UpspecF            | TAAAAAGTGAAATCTTGAGGTAGATCCCCGTTTGATTTTT                                                                                                                                                                |
|                        | VapE_UpspcR             | AAAAATCAAACGGGGGATCTACCTCCAAGATTTCACTTTTTA                                                                                                                                                              |
|                        | VapE_DownspecF          | TTGGATCCATTCCGCGTCGTGTGACGTTCTTTTTTT                                                                                                                                                                    |
|                        | VapE_Downspec R         | CAAAAAAAGAACGTCACACGACGCGGAATGGATCCAA                                                                                                                                                                   |
|                        | VapE_DownR              | CTGTATAATACCAATACGATAGCC                                                                                                                                                                                |
|                        | VapE Up confirmation    | GACATCTGGAAGTTTTTGGGG                                                                                                                                                                                   |
| VapE Down confirmation | CCTGGTTGTTTGTGGTAGTCT   |                                                                                                                                                                                                         |

\*This strain was a kind gift from Prof Daniela Ferreira, Liverpool School of Tropical Medicine.

## Full-length prophages

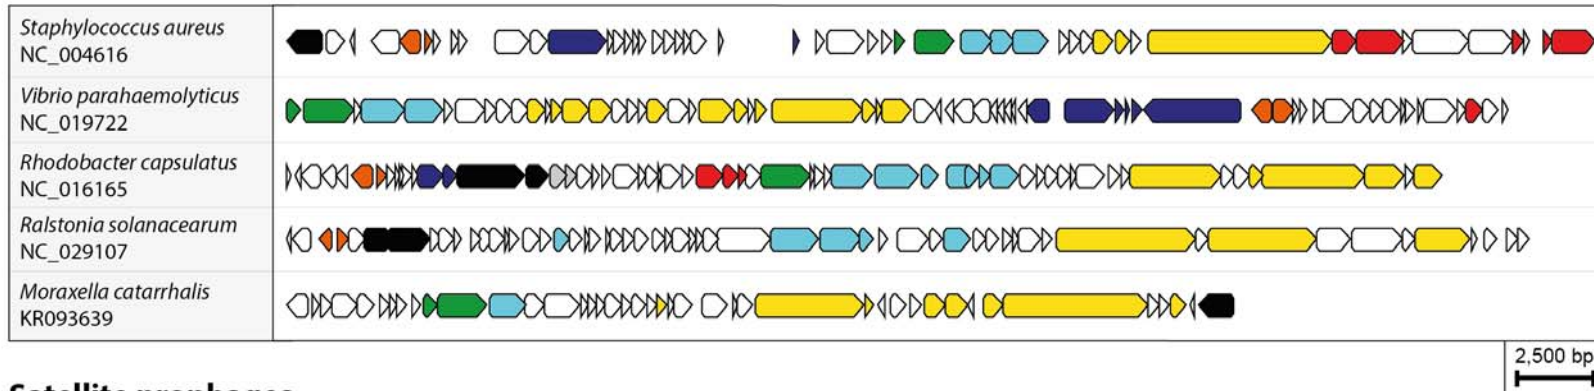

## Satellite prophages

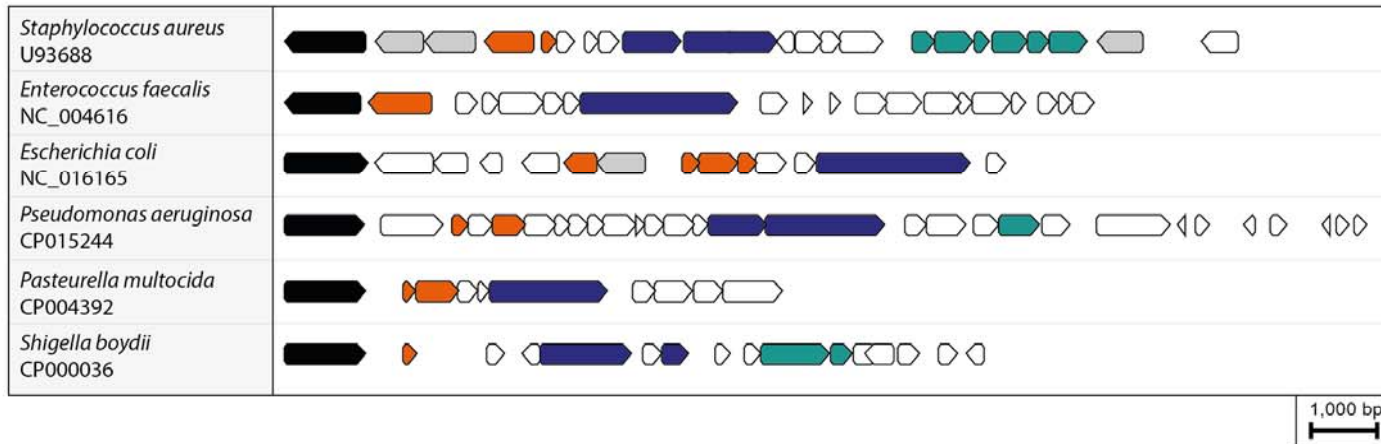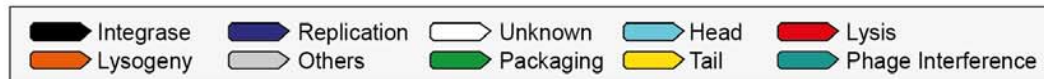

**Supplementary Figure 1. Full-length and satellite prophages in different bacterial species.** The diagrams illustrate the similarity in gene composition and synteny among different prophages identified in a variety of unrelated bacterial species.

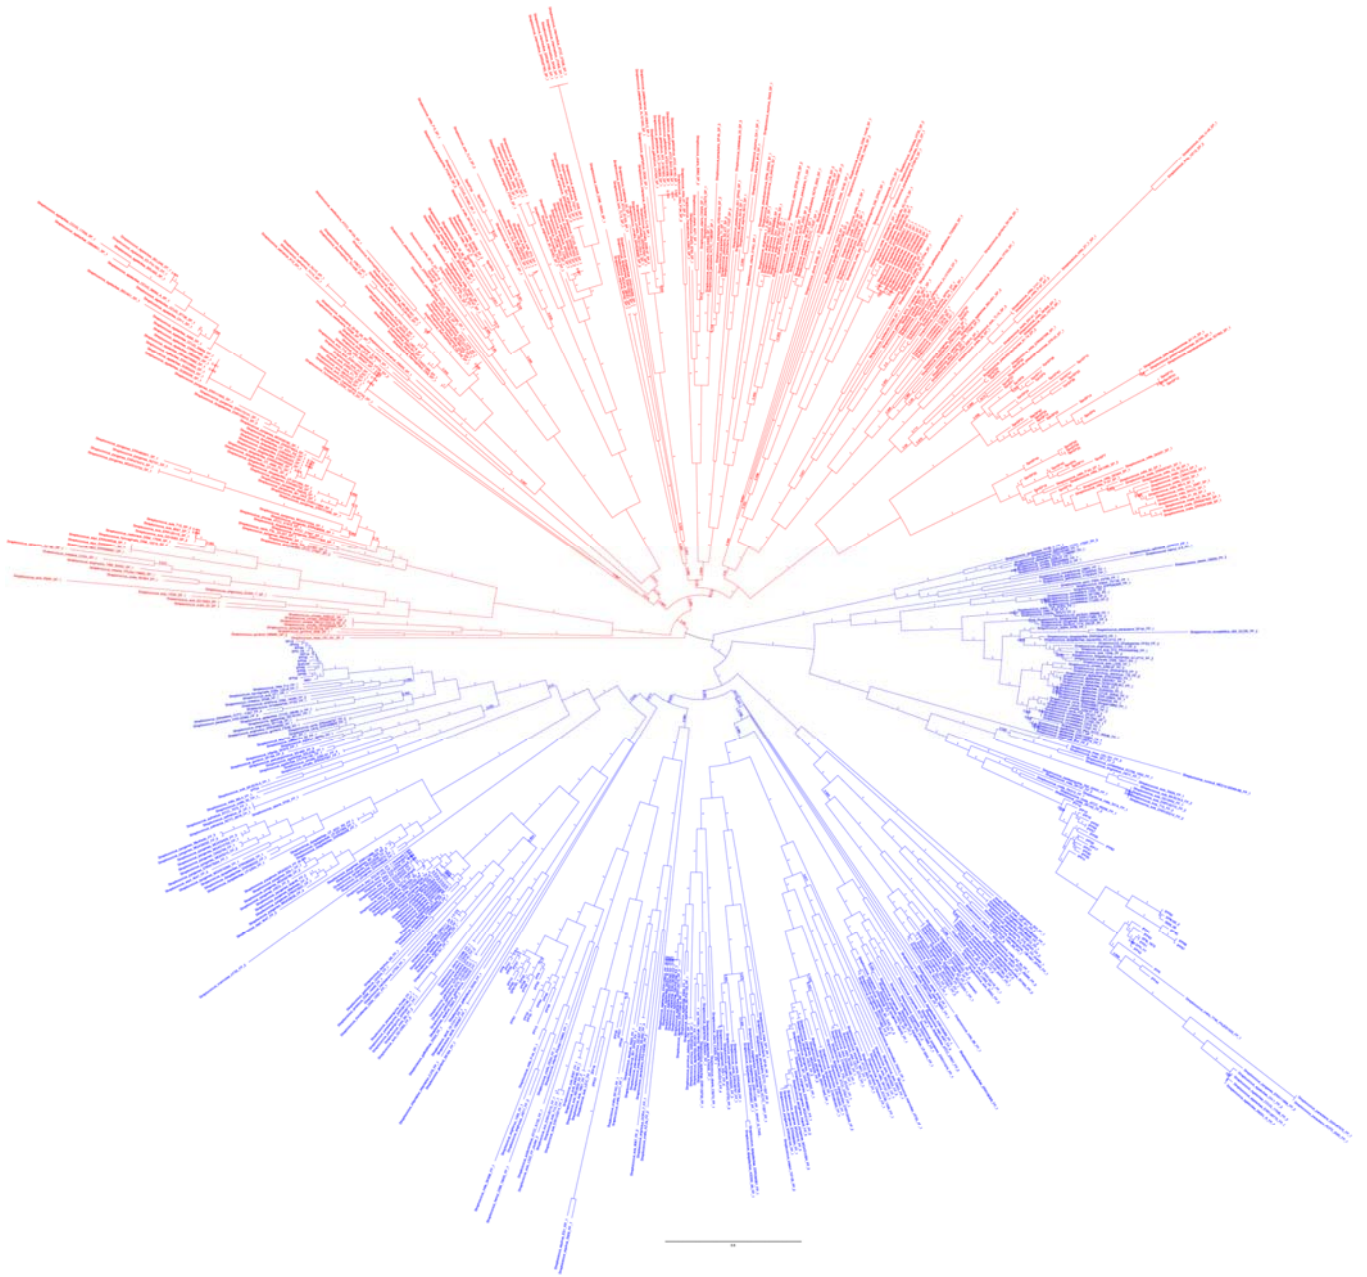

**Supplementary Figure 2. Prophages identified among streptococcal genomes.** An unrooted phylogenetic tree of all streptococcal prophage genomes identified in the dataset. Blue branches mark full-length prophages and red branches mark satellite prophages. Note that this is the annotated version of Figure 1d in the main paper.

|                                    | S_pseudopneumoniae_CCUG_62647_FP_1 | S_pseudopneumoniae_5247_FP_1 | S_pseudopneumoniae_SRR387783_FP_1 | S_pseudopneumoniae_SRR387784_FP_2 | S_pseudopneumoniae_IS7493_FP_2 | S_infantis_SK970_FP_3 | S_oralis_AZ_3a_FP_1 | S_oralis_ATCC_49296_FP_2 | S_parasanguinis_512_SPAR_FP_cluster_1 | S_parasanguinis_139.rep1_SPAR_FP_1 | S_mitis_B9_FP_1 | S_parasanguinis_318_SPAR_FP_2 | S_pyogenes_ERR448936_FP_2 | S_dysgalactiae_ERR109312_FP_1 | S_dysgalactiae_ERR085058_FP_1 | S_equi_EQU10022_FP_2 | S_suis_YS39_FP_1 | S_iniae_SF1_FP_2 |
|------------------------------------|------------------------------------|------------------------------|-----------------------------------|-----------------------------------|--------------------------------|-----------------------|---------------------|--------------------------|---------------------------------------|------------------------------------|-----------------|-------------------------------|---------------------------|-------------------------------|-------------------------------|----------------------|------------------|------------------|
| S_pseudopneumoniae_CCUG_62647_FP_1 | 84.7%                              | 100%                         | 100%                              | 71.4%                             | 49.2%                          | 42.9%                 | 42.4%               | 38.7%                    | 37.7%                                 | 38.0%                              | 38.1%           | 29.8%                         | 29.8%                     | 31.0%                         | 30.0%                         | 28.7%                | 28.9%            |                  |
| S_pseudopneumoniae_5247_FP_1       | 84.7%                              | 84.7%                        | 84.7%                             | 51.7%                             | 47.8%                          | 42.3%                 | 41.8%               | 38.6%                    | 37.6%                                 | 38.0%                              | 38.3%           | 29.8%                         | 29.8%                     | 31.1%                         | 30.0%                         | 29.1%                | 28.9%            |                  |
| S_pseudopneumoniae_SRR387783_FP_1  | 100%                               | 84.7%                        | 100%                              | 71.4%                             | 49.2%                          | 42.9%                 | 42.4%               | 38.7%                    | 37.7%                                 | 38.0%                              | 38.1%           | 29.8%                         | 29.8%                     | 31.0%                         | 30.0%                         | 28.7%                | 28.9%            |                  |
| S_pseudopneumoniae_SRR387784_FP_2  | 100%                               | 84.7%                        | 100%                              | 71.4%                             | 49.2%                          | 42.9%                 | 42.4%               | 38.7%                    | 37.7%                                 | 38.0%                              | 38.1%           | 29.8%                         | 29.8%                     | 31.0%                         | 30.0%                         | 28.7%                | 28.9%            |                  |
| S_pseudopneumoniae_IS7493_FP_2     | 71.4%                              | 51.7%                        | 71.4%                             | 71.4%                             | 43.4%                          | 33.2%                 | 35.4%               | 25.9%                    | 26.5%                                 | 26.7%                              | 26.1%           | 24.3%                         | 24.3%                     | 26.2%                         | 24.3%                         | 21.8%                | 25.1%            |                  |
| S_infantis_SK970_FP_3              | 49.2%                              | 47.8%                        | 49.2%                             | 49.2%                             | 43.4%                          | 51.1%                 | 49.1%               | 40.9%                    | 39.9%                                 | 39.9%                              | 40.1%           | 29.9%                         | 29.9%                     | 31.4%                         | 30.4%                         | 28.1%                | 30.0%            |                  |
| S_oralis_AZ_3a_FP_1                | 42.9%                              | 42.3%                        | 42.9%                             | 42.9%                             | 33.2%                          | 51.1%                 | 63.9%               | 39.5%                    | 38.3%                                 | 38.7%                              | 38.4%           | 30.3%                         | 30.3%                     | 31.5%                         | 30.8%                         | 28.2%                | 29.8%            |                  |
| S_oralis_ATCC_49296_FP_2           | 42.4%                              | 41.8%                        | 42.4%                             | 42.4%                             | 35.4%                          | 49.1%                 | 63.9%               | 37.4%                    | 36.9%                                 | 37.2%                              | 36.9%           | 29.6%                         | 29.6%                     | 30.3%                         | 29.9%                         | 27.3%                | 28.7%            |                  |
| S_parasanguinis_512_SPAR_FP_1      | 38.7%                              | 38.6%                        | 38.7%                             | 38.7%                             | 25.9%                          | 40.9%                 | 39.5%               | 37.4%                    | 74.2%                                 | 74.2%                              | 71.6%           | 69.1%                         | 31.8%                     | 31.8%                         | 33.2%                         | 31.9%                | 28.8%            | 29.0%            |
| S_parasanguinis_139.rep1_SPAR_FP_1 | 37.7%                              | 37.6%                        | 37.7%                             | 37.7%                             | 26.5%                          | 39.9%                 | 38.3%               | 36.9%                    | 74.2%                                 | 74.2%                              | 75.9%           | 66.9%                         | 31.1%                     | 31.1%                         | 32.1%                         | 31.7%                | 27.9%            | 28.3%            |
| S_mitis_B9_FP_1                    | 38.0%                              | 38.0%                        | 38.0%                             | 38.0%                             | 26.7%                          | 39.9%                 | 38.7%               | 37.2%                    | 71.6%                                 | 75.9%                              | 67.1%           | 67.1%                         | 30.4%                     | 30.4%                         | 31.4%                         | 31.2%                | 28.0%            | 28.3%            |
| S_parasanguinis_318_SPAR_FP_2      | 38.1%                              | 38.3%                        | 38.1%                             | 38.1%                             | 26.1%                          | 40.1%                 | 38.4%               | 36.9%                    | 69.1%                                 | 66.9%                              | 67.1%           | 67.1%                         | 30.9%                     | 30.9%                         | 32.3%                         | 31.6%                | 28.6%            | 27.9%            |
| S_pyogenes_ERR448936_FP_2          | 29.8%                              | 29.8%                        | 29.8%                             | 29.8%                             | 24.3%                          | 29.9%                 | 30.3%               | 29.6%                    | 31.8%                                 | 31.1%                              | 30.4%           | 30.9%                         | 100.0%                    | 100.0%                        | 84.0%                         | 78.9%                | 42.9%            | 36.1%            |
| S_dysgalactiae_ERR109312_FP_1      | 29.8%                              | 29.8%                        | 29.8%                             | 29.8%                             | 24.3%                          | 29.9%                 | 30.3%               | 29.6%                    | 31.8%                                 | 31.1%                              | 30.4%           | 30.9%                         | 100.0%                    | 100.0%                        | 84.0%                         | 78.9%                | 42.9%            | 36.1%            |
| S_dysgalactiae_ERR085058_FP_1      | 31.0%                              | 31.1%                        | 31.0%                             | 31.0%                             | 26.2%                          | 31.4%                 | 31.5%               | 30.3%                    | 33.2%                                 | 32.1%                              | 31.4%           | 32.3%                         | 84.0%                     | 84.0%                         | 74.2%                         | 44.4%                | 37.3%            |                  |
| S_equi_EQU10022_FP_2               | 30.0%                              | 30.0%                        | 30.0%                             | 30.0%                             | 24.3%                          | 30.4%                 | 30.8%               | 29.9%                    | 31.9%                                 | 31.7%                              | 31.2%           | 31.6%                         | 78.9%                     | 78.9%                         | 74.2%                         | 44.0%                | 33.4%            |                  |
| S_suis_YS39_FP_1                   | 28.7%                              | 29.1%                        | 28.7%                             | 28.7%                             | 21.8%                          | 28.1%                 | 28.2%               | 27.3%                    | 28.8%                                 | 27.9%                              | 28.0%           | 28.6%                         | 42.9%                     | 42.9%                         | 44.4%                         | 44.0%                | 30.8%            |                  |
| S_iniae_SF1_FP_2                   | 28.9%                              | 28.9%                        | 28.9%                             | 28.9%                             | 25.1%                          | 30.0%                 | 29.8%               | 28.7%                    | 29.0%                                 | 28.3%                              | 27.9%           | 27.9%                         | 36.1%                     | 36.1%                         | 37.3%                         | 33.4%                | 30.8%            |                  |

**Supplementary Figure 3. Genetic similarity among prophages highlighted in Figure 2b.** Pairwise comparisons between eighteen full-length prophage sequences were made and the percentage nucleotide similarity is given for each pair of prophages. Cells are shaded grey based on level of similarity, increasing to black for pairs of sequences that are 100% identical.

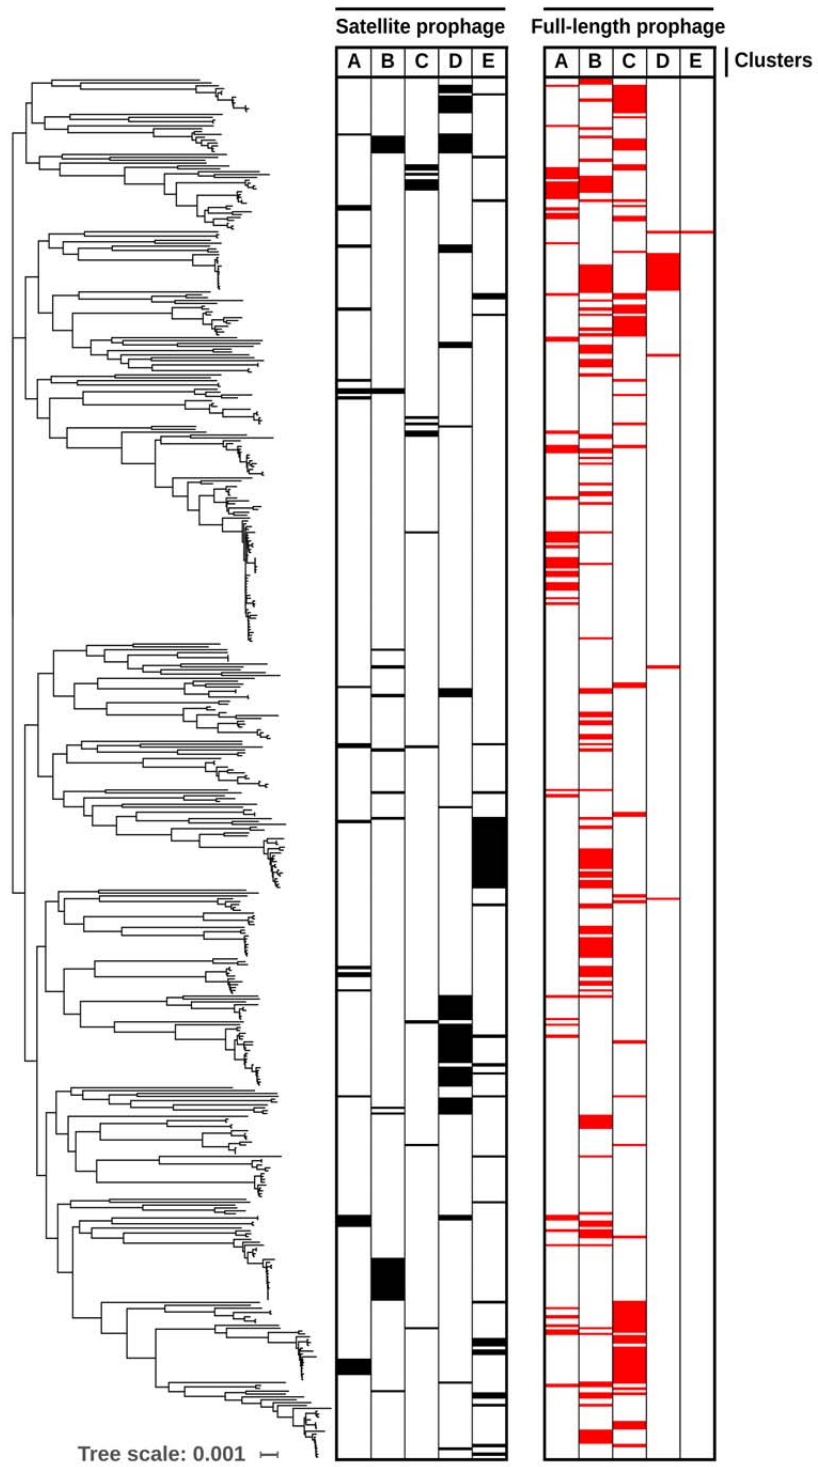

**Supplementary Figure 4. A pneumococcal core genome phylogenetic tree.** The tree is annotated with the corresponding satellite and full-length prophage clusters.

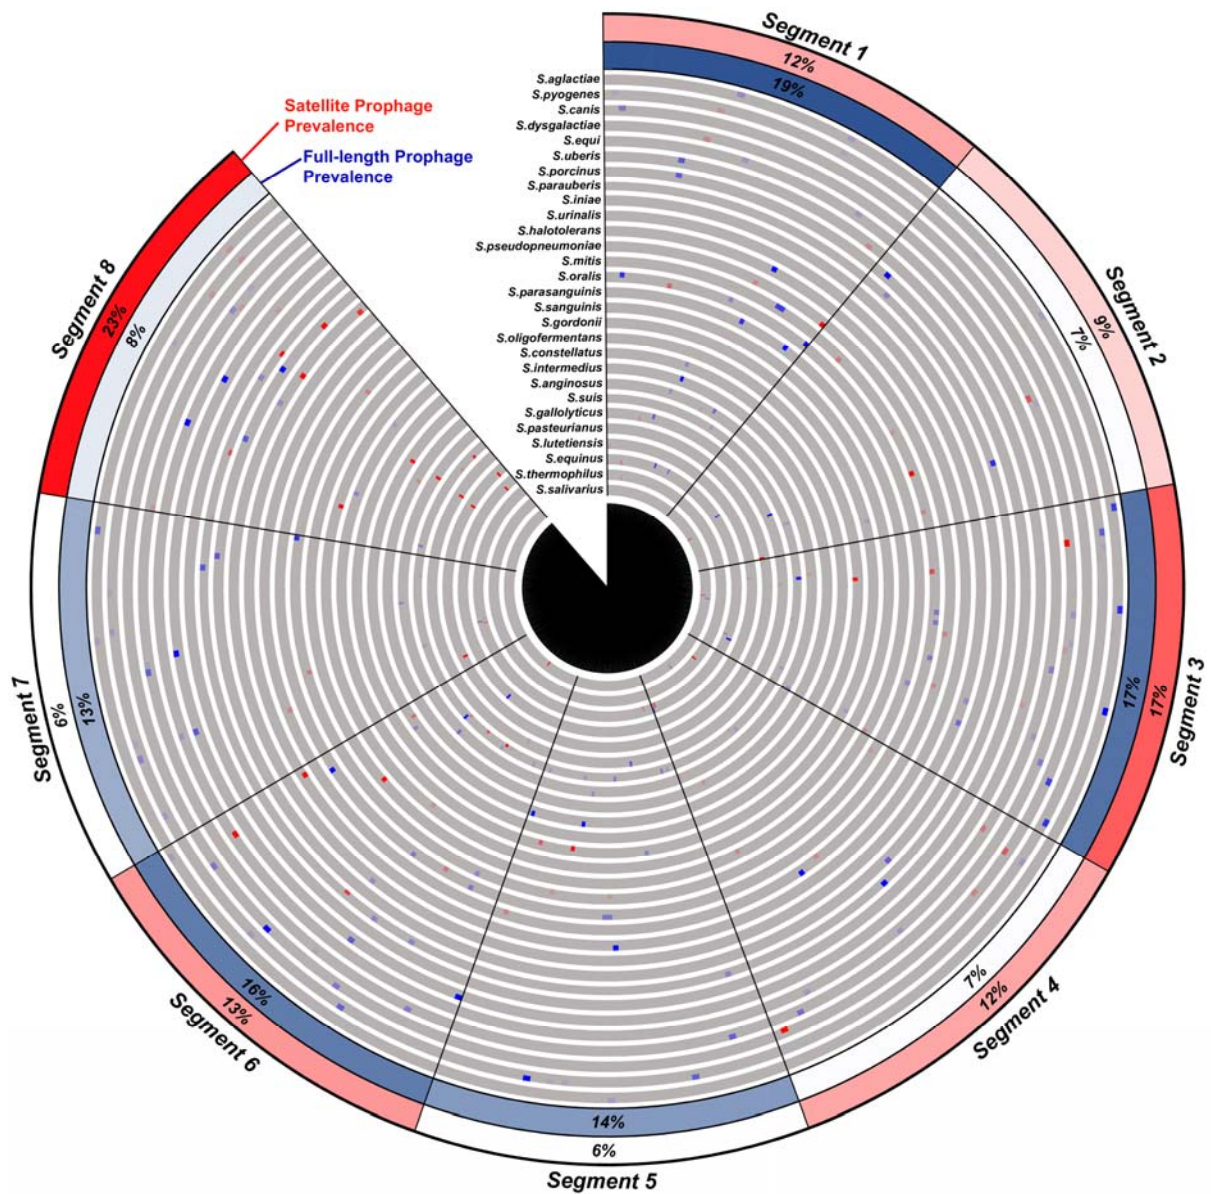

**Supplementary Figure 5. Prophage insertion sites within bacterial genomes.** One finished genome of each of 29 streptococcal species was divided into eight non-overlapping segments of equal length according to the number of base pairs, and the percentages of prophages situated in each segment were quantified. Source data are provided as a Source Data file.



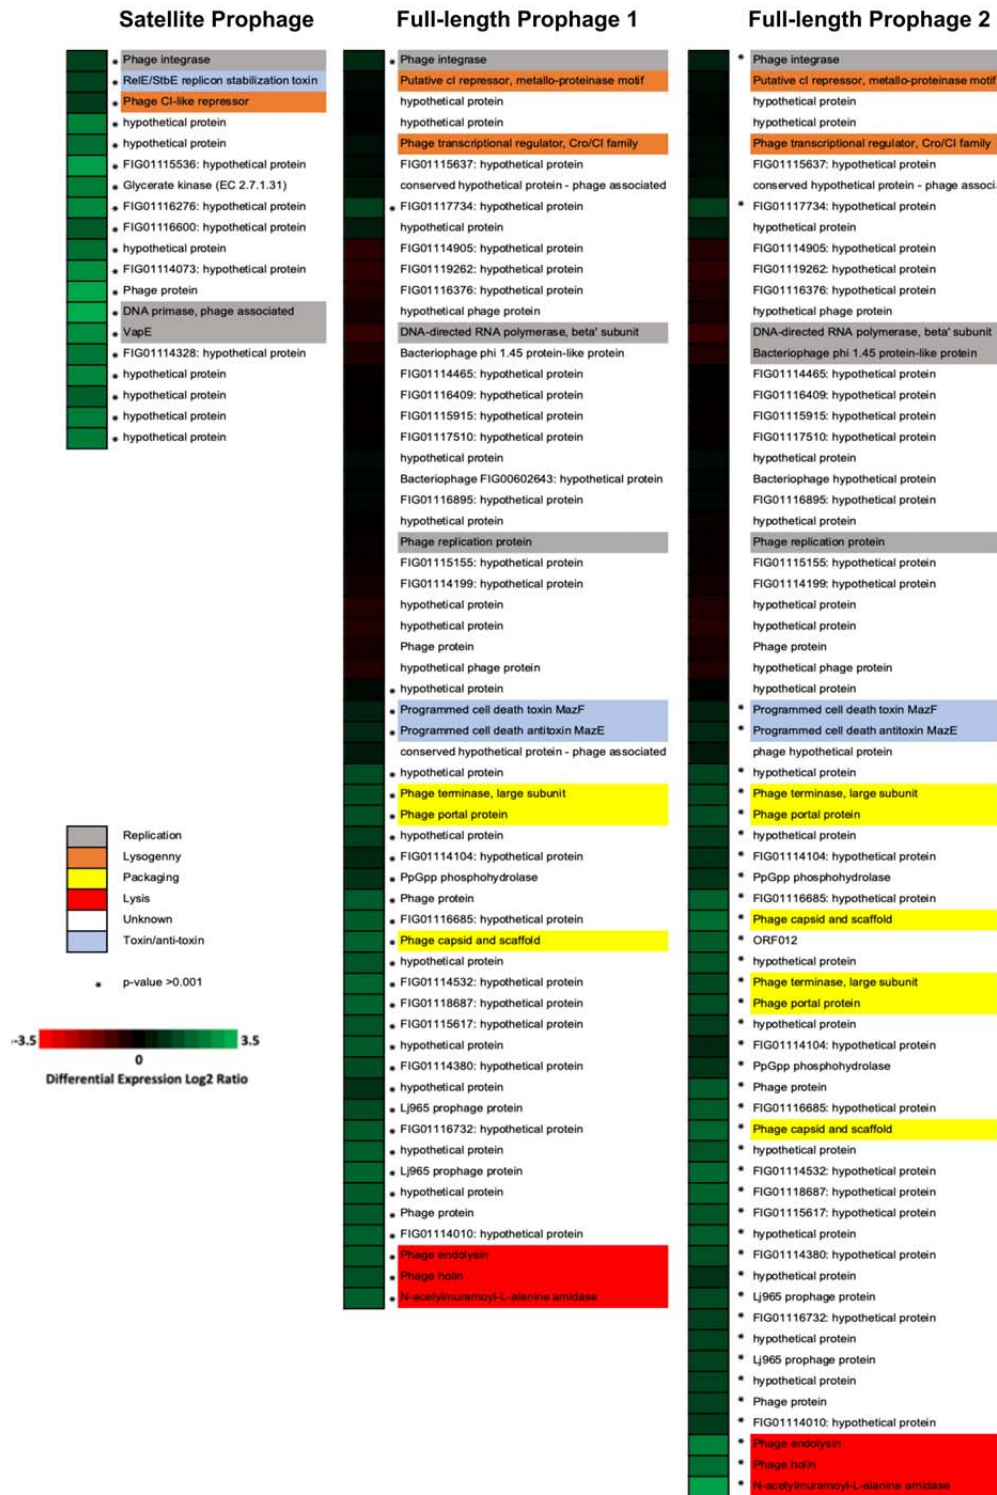

**Supplementary Figure 6. Differential expression levels of three prophages.** Prophage genes were annotated and the differential expression level of each gene during planktonic growth relative to growth in a biofilm is marked by shades of red (down-regulated genes) or green (up-regulated genes). Differential gene expression and statistical significance was computed in Geneious [https://www.geneious.com] using the DESeq2 method (see Methods). An asterisk to the right of a cell indicates a statistically-significant differential level of expression ( $p < 0.05$ ).
